# Supplementary material for: Mix and (mis-)match – The mechanosensing machinery in the changing environment of the developing, healthy adult and diseased heart
Source: PubMed Central journal article supplement (PMC7042712; doi:10.1016/j.bbamcr.2019.01.017), 2020-03
Supplement: mmc1.pdf [file mmc1.pdf]

## **Multiple files are bound together in this PDF Package.**

Adobe recommends using Adobe Reader or Adobe Acrobat version 8 or later to work with documents contained within a PDF Package. By updating to the latest version, you'll enjoy the following benefits:

- Efficient, integrated PDF viewing
- Easy printing
- Quick searches

**Don't have the latest version of Adobe Reader?**

**[Click here to download the latest version of Adobe Reader](#)**

**If you already have Adobe Reader 8,  
click a file in this PDF Package to view it.**
